# Supplementary material
Source: PubMed Central journal article supplement (PMC1976567)
Supplement: plntphys_pp.107.098335_5.pdf [file plntphys_pp.107.098335_5.pdf]

1 **Supplementary Table I.** Primer sequences used to amplify full-length cDNA clones of  
2 *SIGA2ox1*, -2, -3, -4 and -5.

3  
4

| Gene            | Sense primer                      | Antisense primer                    |
|-----------------|-----------------------------------|-------------------------------------|
| <i>SIGA2ox1</i> | 5'- CCTCAACTTCCAACATGGTTTCTG -3'  | <i>Not</i> I-d(T) <sub>18</sub>     |
| <i>SIGA2ox2</i> | 5'- CACTTACCAAAAATCAACCATGGTG -3' | 5'- CCCACAATGAGCATCTTGACAACC -3'    |
| <i>SIGA2ox3</i> | 5'- CATTGATTAATTATGGTAGTAGC -3'   | <i>Not</i> I-d(T) <sub>18</sub>     |
| <i>SIGA2ox4</i> | 5'- ACAAACAACAATTTCTACCAAAGT -3'  | <i>Not</i> I-d(T) <sub>18</sub>     |
| <i>SIGA2ox5</i> | 5'-CACCAGCAACAGTTGTAACAAGA-3'     | 5'- GATCCAAACATGGTATATTTGCGGAGG -3' |

5 *Not* I-d(T)<sub>18</sub> (from Amersham Biosciences)

6

7

1  
2  
3  
4  
5  
6

**Supplementary Table II.** Primer sequences used for semiquantitative RT-PCR analysis of diverse GA metabolism genes of tomato. *SICPS* (AB015675), *SIGA2ox1* (AF049898), *SIGA2ox2* (AF049899), *SIGA2ox3* (AF049900), *SIGA3ox1* (AB010991), *SIGA3ox2* (AB010992), *SIGA2ox1*, -2, -3, -4 and -5, and *SIACT* (*Actin*) (AB199316).

| Gene            | Sense                                 | Antisense                          |
|-----------------|---------------------------------------|------------------------------------|
| <i>SICPS</i>    | 5'-GGAAAATTGGCTACTGACGGTAGG-3'        | 5'-GGCATCCAATTCGGAAGCA-3'          |
| <i>SIGA2ox1</i> | 5'-GGAGCTCGCCTTAGGAACG-3'             | 5'-GTAGAAGCTAAGAGAACGTGTACACG-3'   |
| <i>SIGA2ox2</i> | 5'-CAACGTCTCAGGACTACAAGTTTTTC-3'      | 5'-AGGCTAAGGTCTTGATCTACATTGG-3'    |
| <i>SIGA2ox3</i> | 5'-ACACCATCACTCCAAATTTCAAC-3'         | 5'-CCATGAGGTTCCATTTCTATGTC-3'      |
| <i>SIGA3ox1</i> | 5'-GTGAAACCAAAGAAGGATGTG-3'           | 5'-GCATCAGTAAATCCATTTAAAGGGA-3'    |
| <i>SIGA3ox2</i> | 5'-GTAACGGTTCCTCTCCTTCGC-3'           | 5'-ACCTACTTGGACGCCACTTTG-3'        |
| <i>SIGA2ox1</i> | 5'-ACCCACATCTTCTCCATCAT G-3'          | 5'-ACATGTTTCATCAAGGGTTCGAT-3'      |
| <i>SIGA2ox2</i> | 5'-GCCATGCTCAGAGATTGAACGATTG-3'       | 5'-CCCACAATGAGCATCTTGACAACC-3'     |
| <i>SIGA2ox3</i> | 5'-GCTAACAATCCTTCGATCAAATGACG-3'      | 5'-GCATAATGCATACACCTCCAAGGCC-3'    |
| <i>SIGA2ox4</i> | 5'-GTCGATTTTAAGATCCAACAACACTTCCGGT-3' | 5'-CATCATTTTCAACATAACGAGTCCTTCC-3' |
| <i>SIGA2ox5</i> | 5'-ATATCGGTATTAAGATCCAACAACACATCC-3'  | 5'-GATCCAAACATGGTATATTTGCGGAGG-3'  |
| <i>SIACT</i>    | 5'-ATGTATGTTGCCATCCAGGCTG-3'          | 5'-CCTTGCTCATCCTATCAGCAGCAATACC-3' |

7  
8  
9
