# Supplementary material
Source: PubMed Central journal article supplement (PMC1976567)
Supplement: plntphys_pp.107.098335_6.pdf [file plntphys_pp.107.098335_6.pdf]

## SUPPLEMENTAL FIGURE LEGENDS

**Supplementary Fig. 1.** Scheme of GA metabolic pathways.

**Supplementary Fig. 2.** Maximum likelihood phylogenetic tree based on comparison of *GA20ox*, *GA3ox* and *GA2ox* protein sequences from Arabidopsis and tomato. Branch lengths are proportional to sequence divergence. Bootstrap values above 50% are shown, whereas asterisks indicate statistical significance according to the weighted least-squares likelihood ratio test (\*\*,  $P < 0.01$ ; \*,  $P < 0.05$ ). The five genes characterized in this study are shown in bold type. Accession numbers corresponding to the sequences in the tree are the following: AtGA20ox1, X83379; AtGA20ox2, X83380; AtGA20ox3, X83381; AtGA20ox4, NM104778; AtGA20ox5, DQ056484; AtGA3ox1, L37126; AtGA3ox2, AF070937; AtGA3ox3, NM118289; AtGA3ox4, NM106682; AtGA2ox1, AJ132435; AtGA2ox2, AJ132436; AtGA2ox3, AJ322437; AtGA2ox4, NM103695; AtGA2ox6, NM100121; AtGA2ox7, AC079284; AtGA2ox8, AL021960; SIGA20ox1, AF049898; SIGA20ox2, AF049899; SIGA20ox3, AF049900; SIGA3ox1, AB010991; SIGA3ox2, AB010992; SIGA2ox1, EF441351; SIGA2ox2, EF441352; SIGA2ox3, EF441353; SIGA2ox4, EF441354; SIGA2ox5, EF441355.

**Supplementary Fig. 3.** HPLC radioactivity traces of products of [ $^{14}\text{C}$ ]GA<sub>12</sub>, [ $^{14}\text{C}$ ]GA<sub>9</sub>, [ $^{14}\text{C}$ ]GA<sub>4</sub>, [ $^{14}\text{C}$ ]GA<sub>53</sub>, [ $^{14}\text{C}$ ]GA<sub>20</sub>, and [ $^{14}\text{C}$ ]GA<sub>1</sub>, incubated with heterologous expression products of *SIGA2ox1*, -3, -4 and -5 after 2 h incubation at 30°C.

**Supplementary Fig. 4.** Alignment of amino acid sequences corresponding to GA 2-oxidases from groups I, II and III used to construct the phylogenetic tree of Fig. 5. ○, Fe<sup>2+</sup> binding residues; ↑, 2-oxoglutarate binding residues; ●, amino acids conserved in groups I and II.
