# Supplementary material
Source: PubMed Central journal article supplement (PMC1976567)

Sup. Fig 1

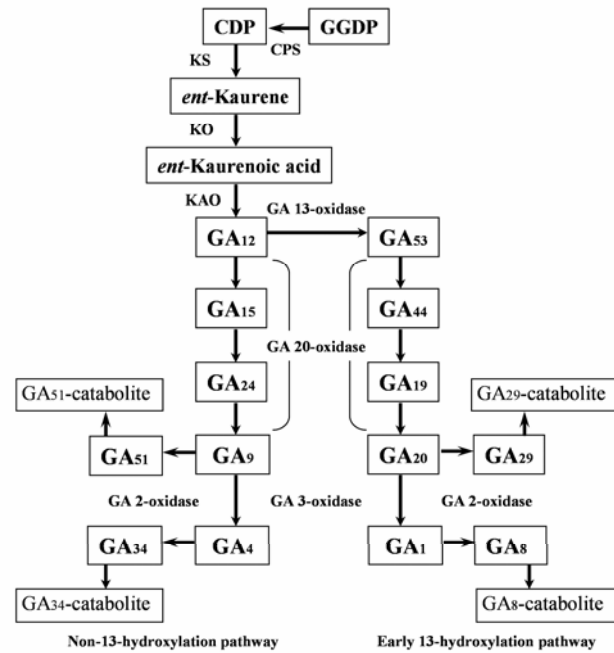

Supplement: plntphys_pp.107.098335_1.pdf [file plntphys_pp.107.098335_1.pdf]

Sup. Fig. 2

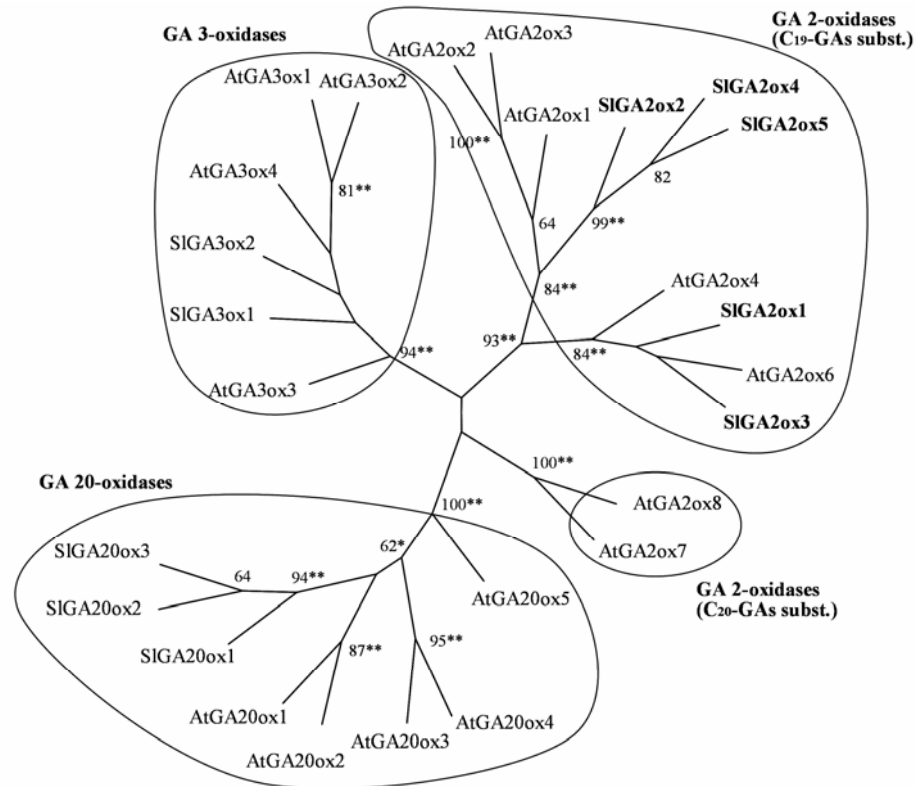

Supplement: plntphys_pp.107.098335_2.pdf [file plntphys_pp.107.098335_2.pdf]

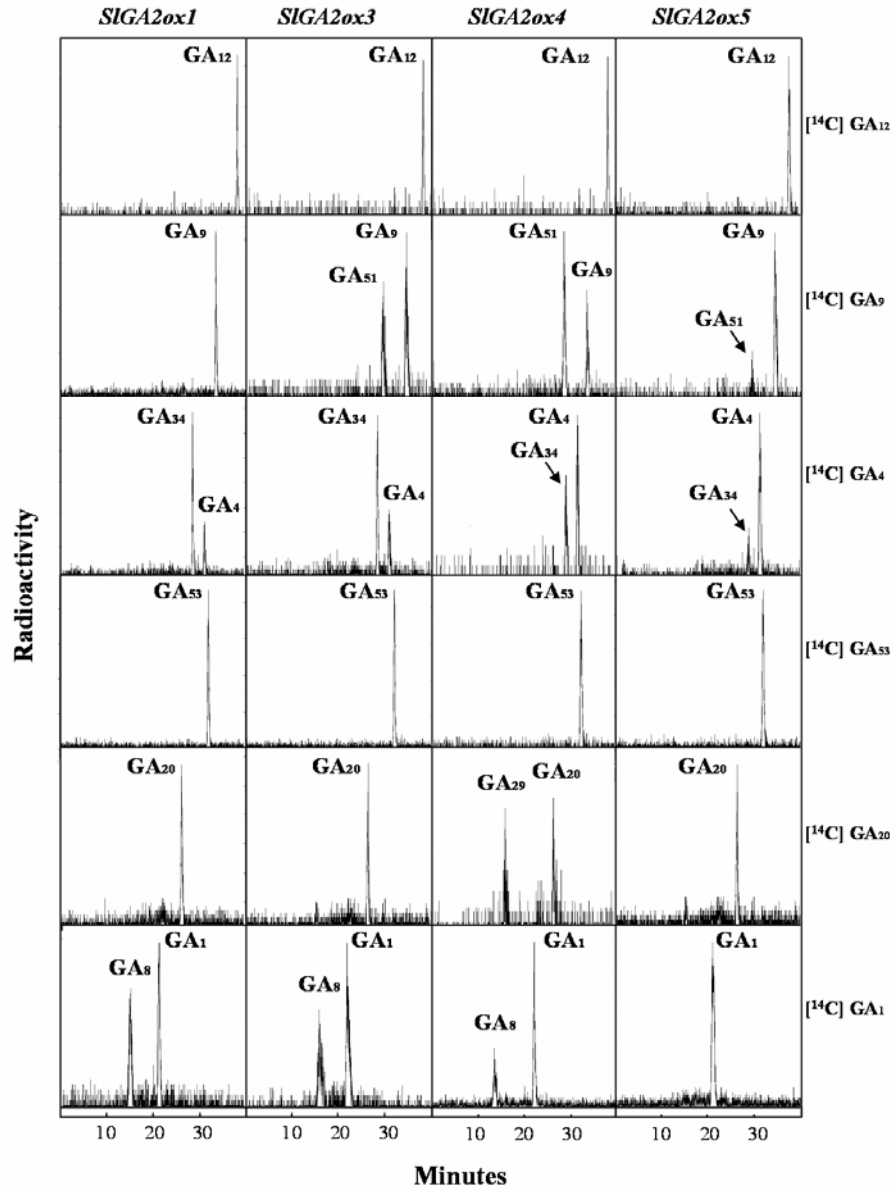

Supplement: plntphys_pp.107.098335_3.pdf [file plntphys_pp.107.098335_3.pdf]

# Sup. Fig 4A

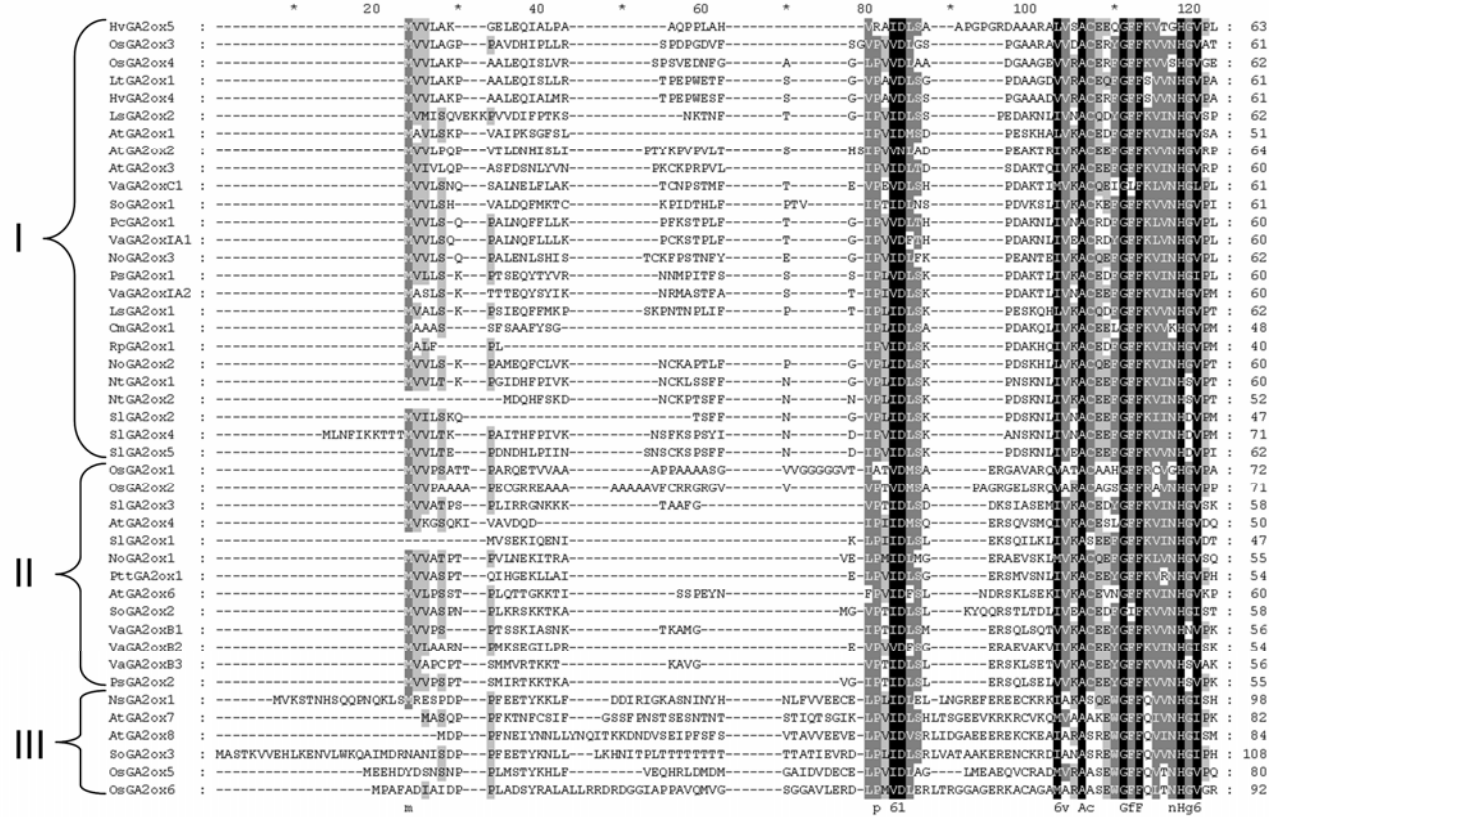

# Sup. Fig 4B

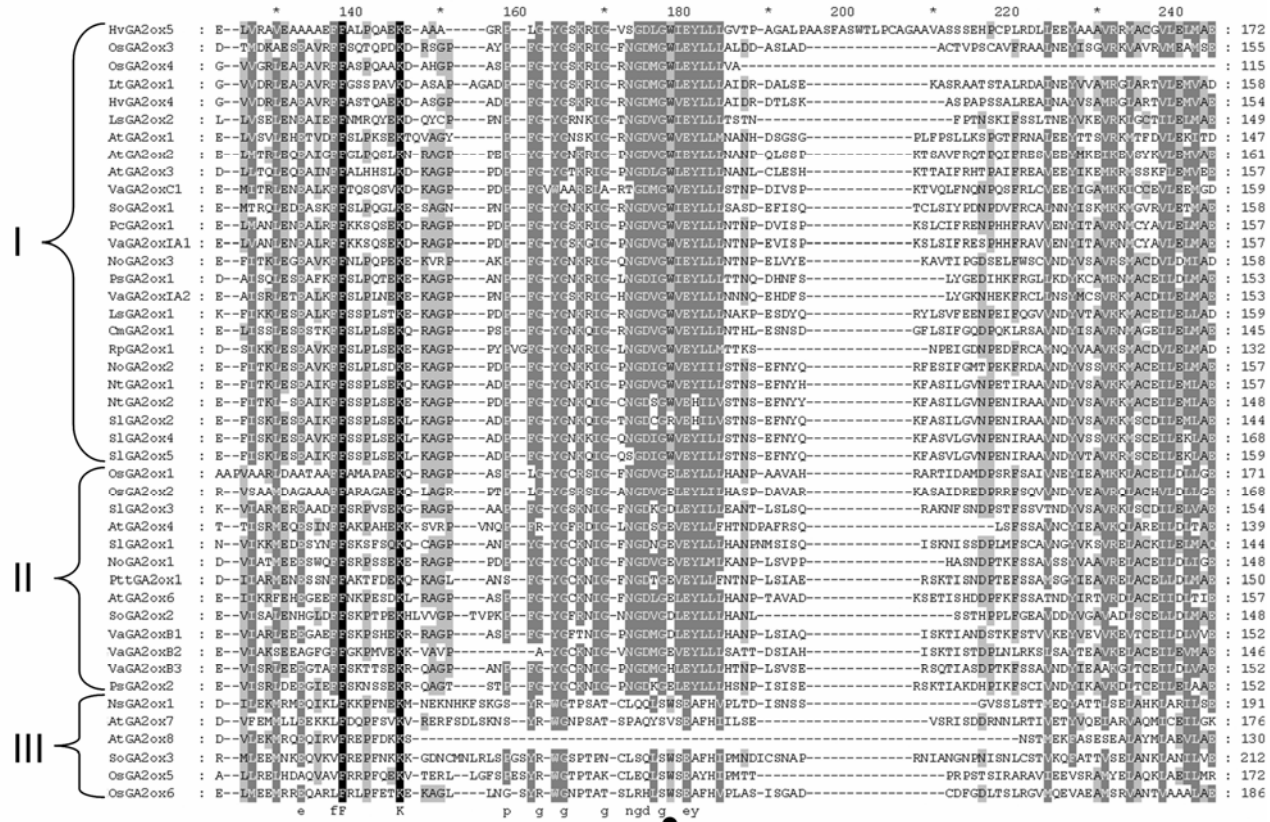

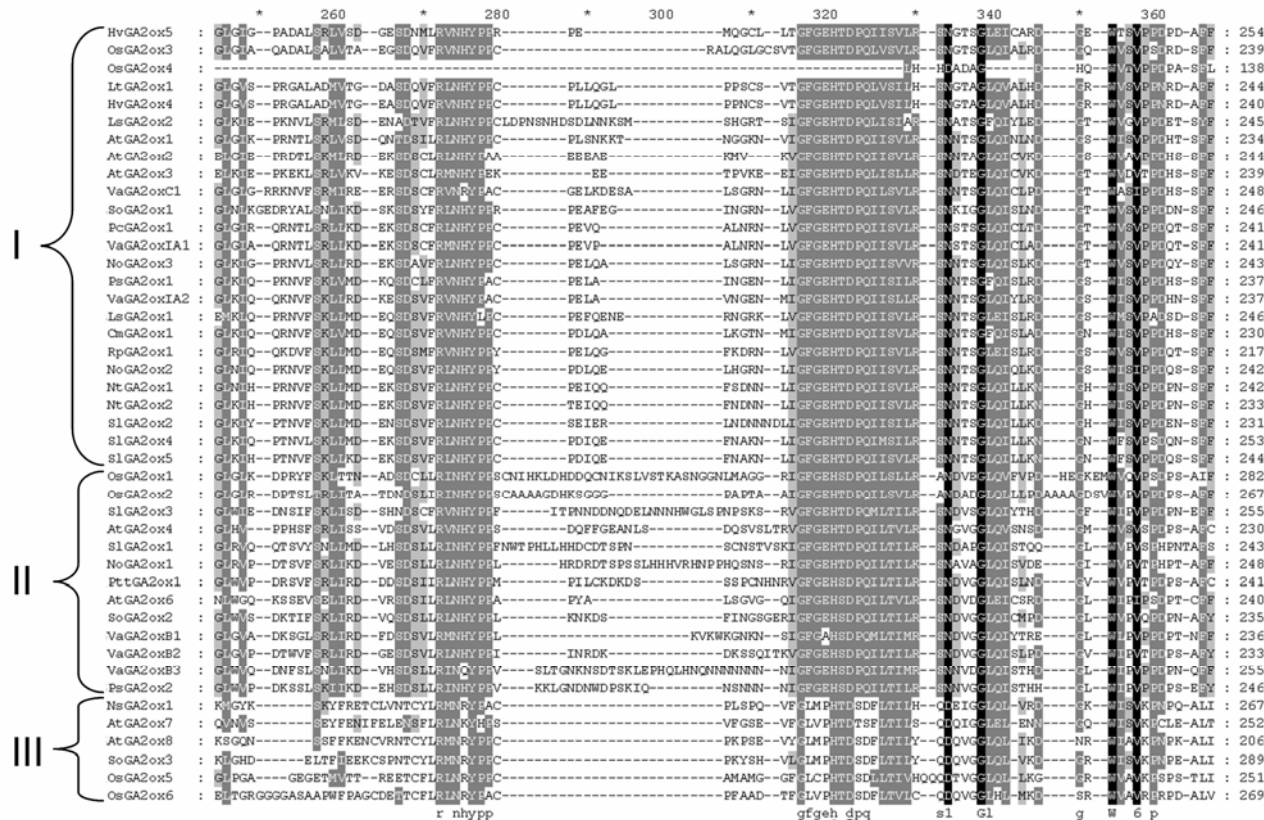

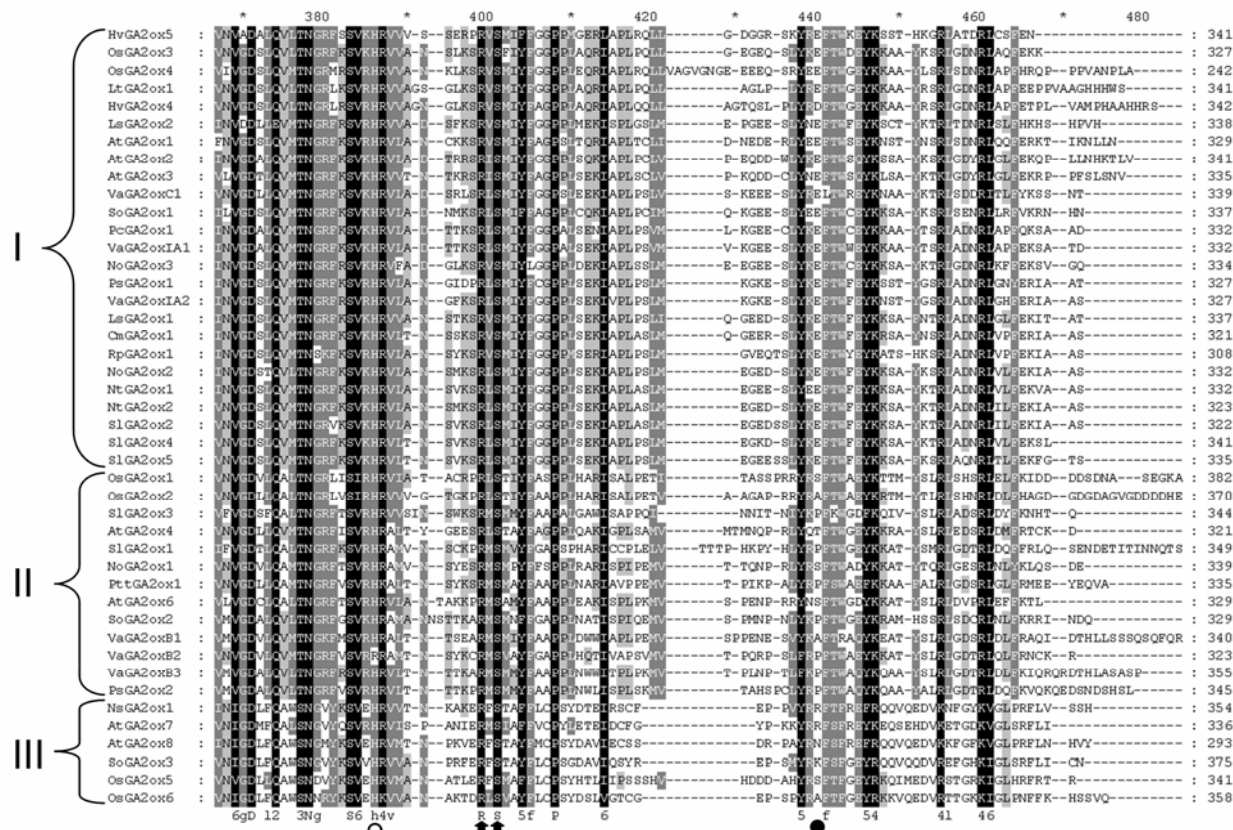

Supplement: plntphys_pp.107.098335_4.pdf [file plntphys_pp.107.098335_4.pdf]
